# Supplementary material for: Allosteric inhibition of the T cell receptor by a designed membrane ligand
Source: eLife journal article supplement (doi:10.7554/elife.82861), 2023-09-21
Supplement: data1 [file Figure1_sup1.xlsx]

## Sheet: Figure-sup1B
wavelength (nm)	PITCR	PITCRG41P
260	0.037713	0.0530799
259	0.034158	0.0421053
258	0.026575	0.0509882
257	0.028057	0.0367636
256	0.019293	0.034304
255	0.018375	0.0184281
254	0.027234	0.0285583
253	0.028519	0.0438757
252	0.003539	0.0164107
251	-0.02254	-0.0158276
250	-0.0454	-0.0244748
249	-0.00575	0.00705703
248	-0.03744	0.0167621
247	-0.02236	-0.0332682
246	-0.05701	-0.11569
245	-0.11619	-0.183067
244	-0.17935	-0.202123
243	-0.25228	-0.247259
242	-0.30537	-0.324855
241	-0.38456	-0.426908
240	-0.44331	-0.534319
239	-0.54614	-0.622139
238	-0.63159	-0.759713
237	-0.72812	-0.932001
236	-0.81265	-1.11444
235	-0.9018	-1.24768
234	-1.02059	-1.34415
233	-1.12498	-1.46241
232	-1.22536	-1.58388
231	-1.27298	-1.7053
230	-1.37047	-1.79033
229	-1.42788	-1.80988
228	-1.52993	-1.83541
227	-1.51496	-1.87971
226	-1.53412	-1.85047
225	-1.56024	-1.81108
224	-1.57896	-1.78759
223	-1.59077	-1.71523
222	-1.60227	-1.78254
221	-1.59857	-1.73411
220	-1.64278	-1.80927
219	-1.71509	-1.85646
218	-1.85603	-2.01717
217	-2.06489	-2.16882
216	-2.32677	-2.42473
215	-2.48774	-2.70717
214	-2.68988	-3.00966
213	-2.93148	-3.20785
212	-3.22845	-3.52205
211	-3.66265	-3.90872
210	-4.09381	-4.46648
209	-4.58525	-5.19697
208	-5.23241	-6.01748
207	-5.92912	-6.8305
206	-6.71184	-7.74842
205	-7.37183	-8.57629
204	-8.04692	-9.41239
203	-8.65766	-10.2039
202	-9.29591	-10.9168
201	-9.72834	-11.4589
200	-9.87208	-12.018
199	-9.85152	-12.2461
198	-9.60037	-12.4597
197	-9.23525	-12.3653
196	-8.68917	-12.1188
195	-8.021	-11.7546

## Sheet: Figure-sup1C
wavelength (nm)	PITCR	PITCRG41P
260	0.007039	0.112992
259	-0.01609	0.0655375
258	-0.05742	0.0193734
257	-0.06739	0.0293484
256	-0.03619	0.0621047
255	-0.04002	0.0323719
254	0.01521	0.0468297
253	0.011507	0.0181328
252	0.022073	-0.0148375
251	-0.02646	-0.000179688
250	-0.01975	0.00983906
249	-0.02967	0.0454906
248	-0.05942	0.0223078
247	-0.10115	-0.0405266
246	-0.16277	-0.0587797
245	-0.19612	-0.126572
244	-0.20196	-0.156619
243	-0.21463	-0.193256
242	-0.29832	-0.295272
241	-0.36814	-0.467416
240	-0.46139	-0.617439
239	-0.50739	-0.697421
238	-0.54553	-0.722033
237	-0.64714	-0.848794
236	-0.78822	-0.948728
235	-0.87134	-1.09964
234	-0.99104	-1.23179
233	-1.07368	-1.3509
232	-1.20258	-1.40664
231	-1.33551	-1.51314
230	-1.36847	-1.59631
229	-1.43152	-1.6928
228	-1.47388	-1.80488
227	-1.5129	-1.80887
226	-1.58167	-1.83337
225	-1.69695	-1.72743
224	-1.70131	-1.72294
223	-1.66003	-1.61124
222	-1.62043	-1.53679
221	-1.67187	-1.5196
220	-1.78305	-1.5265
219	-1.90384	-1.67226
218	-1.9945	-1.74804
217	-2.13989	-1.879
216	-2.32533	-2.10129
215	-2.57574	-2.25181
214	-2.75462	-2.6478
213	-2.82274	-3.04159
212	-3.03557	-3.34584
211	-3.32435	-3.811
210	-3.82501	-4.25624
209	-4.42181	-4.94575
208	-4.9506	-5.78925
207	-5.65176	-6.74543
206	-6.22512	-7.87008
205	-6.60628	-8.50419
204	-7.13257	-9.52042
203	-7.46094	-10.3262
202	-8.02627	-11.3449
201	-8.22136	-11.5657
200	-8.36188	-11.7952
199	-7.89392	-11.8939
198	-6.92814	-12.5073
197	-6.49419	-13.2147
196	-6.30155	-12.0301
195	-5.79577	-9.83158

## Sheet: Figure-sup1D
wavelength (nm)	PITCR	PITCRG41P
260	-0.04691	-0.0653453
259	-0.053754	-0.0463984
258	-0.010752	-0.0202391
257	-0.026505	-0.0248203
256	-0.0124	-0.0101844
255	-0.015667	-0.0238281
254	-0.011878	-0.0198859
253	0.004485	-0.0727703
252	-0.011201	-0.0276719
251	-0.031275	-0.0458
250	-0.019895	-0.0651266
249	-0.065934	-0.128039
248	-0.093007	-0.265539
247	-0.189397	-0.342365
246	-0.279755	-0.512284
245	-0.40846	-0.631239
244	-0.548832	-0.836291
243	-0.751201	-0.969208
242	-0.9561	-1.13683
241	-1.24778	-1.36779
240	-1.58156	-1.7533
239	-2.15094	-2.28977
238	-2.70316	-2.8258
237	-3.42221	-3.47005
236	-4.10302	-4.15949
235	-4.93911	-4.96692
234	-5.92498	-5.79529
233	-7.002	-6.60773
232	-8.21999	-7.47225
231	-9.47272	-8.41524
230	-10.7629	-9.34391
229	-11.961	-10.297
228	-13.0496	-11.3299
227	-14.081	-12.2439
226	-14.9919	-12.9993
225	-15.8358	-13.6147
224	-16.5046	-14.1033
223	-16.9598	-14.5913
222	-17.333	-15.0588
221	-17.4365	-15.2815
220	-17.5217	-15.4126
219	-17.424	-15.3542
218	-17.3021	-15.2937
217	-17.1484	-15.2573
216	-16.8868	-15.2326
215	-16.607	-15.081
214	-16.2386	-14.9261
213	-16.0031	-14.5706
212	-15.8492	-14.2392
211	-15.7717	-13.9925
210	-15.4264	-13.6191
209	-14.9129	-13.2089
208	-13.9842	-12.1278
207	-12.3436	-10.377
206	-9.73102	-7.96162
205	-6.25018	-4.64679
204	-1.8872	-0.608387
203	3.01218	4.0821
202	8.36677	9.07433
201	14.416	14.5393
200	20.0553	19.7444
199	26.6447	25.334
198	31.5159	29.5487
197	35.7631	34.2983
196	39.171	35.8392
195	45.5166	36.0099

## Sheet: Figure-sup1E
pH	Molar ellipticity
8	-1.81488
7.51	-1.9439
7.21	-1.87079
7.16	-1.96118
6.93	-1.89671
6.79	-1.82682
6.49	-1.60055
6.28	-1.69641
6.13	-2.32724
6.39	-2.30251
5.95	-3.62942
5.77	-11.795
5.47	-14.3464
5.29	-15.4251
5.1	-15.9932
4.88	-16.5966
4.72	-16.5349
4.56	-16.7962
4.46	-17.4351
4.39	-17.4802
