# Supplementary material for: Allosteric inhibition of the T cell receptor by a designed membrane ligand
Source: eLife journal article supplement (doi:10.7554/elife.82861), 2023-09-21
Supplement: data1 [file Figure1_Suppl2.xlsx]

## Sheet: Figure1_Figuresupl2
z-Y142
Ctrl								PITCR
0.178571	0.145414	0.134737	0.169666	0.179335	0.075243	0.137398	0.414141	0.174518	0.07707	0.12406	0.13758	0.091176	0.062185	0.104464	0.202558
z-Y83
Ctrl								PITCR
0.017621	0.065771	0.019677	0.022371	0.043089				0.015935	0.04649	0.014701	0.011019	0.035268
