# Supplementary material for: Allosteric inhibition of the T cell receptor by a designed membrane ligand
Source: eLife journal article supplement (doi:10.7554/elife.82861), 2023-09-21
Supplement: data1 [file Figure1C.xlsx]

## Sheet: Norm_z-pY142
ctrl	1	1	1	1	1	1	1	1
PITCR	0.977303	0.530004	0.920757	0.810887	0.508412	0.826456	0.760302	0.489104

## Sheet: Norm_z_pY83
ctrl	1	1	1	1	1
PITCR	0.904319	0.706849	0.747116	0.492557	0.818492
