# Supplementary material for: Allosteric inhibition of the T cell receptor by a designed membrane ligand
Source: eLife journal article supplement (doi:10.7554/elife.82861), 2023-09-21
Supplement: data1 [file Figure2_Suppl2.xlsx]

## Sheet: Sheet1
Figure B Norm LckY394
Ctrl					PITCR
1	1	1	1		1.01232	0.977802	1.19677	0.929181
Figure C Norm LckY505
Ctrl					PITCR
1	1	1	1		0.986609	1.00389	1.13542	0.942101
Figure D LckY394
Ctrl					PITCR
0.0227879	0.024399	0.020306	0.00641509		0.0230686	0.023857	0.024301	0.00596078
Figure E LckY505
Ctrl					PITCR
0.165758	0.166139	0.148624	0.0720126		0.163538	0.166786	0.16875	0.0678431
