# Supplementary material for: Allosteric inhibition of the T cell receptor by a designed membrane ligand
Source: eLife journal article supplement (doi:10.7554/elife.82861), 2023-09-21
Supplement: data1 [file Figure2B.xlsx]

## Sheet: Norm_pZapY319
ctrl	1	1	1	1	1	1	1
PITCR	0.723136	0.950562	0.950837	0.700883	0.665874	0.573555	0.784544

## Sheet: Norm_pZapY493
ctrl	1	1	1	1	1	1	1	1
PITCR	0.683746	0.928186	0.78569	0.646208	0.883993	0.858212	0.298521	0.741809

## Sheet: Norm_pLATY132
ctrl	1	1	1	1	1	1
PITCR	0.53607	0.74195	0.667293	0.910294	0.500673	0.82729

## Sheet: Norm_pLATY191
ctrl	1	1	1	1	1
PITCR	0.605355	0.739717	0.815115	0.622606	0.757651

## Sheet: Norm_pSLP76Y128
ctrl	1	1	1	1	1	1	1
PITCR	0.578808	0.449586	0.909905	0.996024	0.757357	0.765467	0.578808

## Sheet: Norm_pPLCg1Y783
ctrl	1	1	1	1	1	1	1	1
PITCR	0.650424	0.529491	0.684805	0.889624	0.624222	0.887067	0.607771	0.650424
