# Supplementary material for: Allosteric inhibition of the T cell receptor by a designed membrane ligand
Source: eLife journal article supplement (doi:10.7554/elife.82861), 2023-09-21
Supplement: data1 [file Figure3.xlsx]

## Sheet: Figure3A
Time (S)	PITCR						No peptide
0	1.31136	0.330347	0.599554	0.886576		1.86869	2.01135	1.78472	1.36292
33	0.510455	0.614714	0.660699	0.862336		2.92043	0.84562	1.33649	1.76575
66	1.38231	1.02846	1.05778	0.746638		2.28083	1.21359	1.38153	1.38824
99	0.619335	0.679758	0.94319	0.780772		1.36656	1.06441	1.23724	1.17269
132	1.64879	1.00229	1.3706	1.58699		3.21282	1.77196	1.99046	3.16326
165	1.32708	0.786618	2.01903	1.05166		3.83072	2.31536	1.90203	3.24716
198	0.76523	1.42643	1.45649	0.904059		2.74275	3.34308	3.08081	2.27445
231	1.00375	1.52908	0.908667	1.11684		2.348	3.1736	2.06313	2.06883
264	2.4092	1.42741	1.69746	1.50817		2.72448	2.14424	3.15825	2.03732
297	1.63507	0.529226	1.22101	1.59686		1.55078	2.04483	2.35721	3.03554
330	3.02309	2.29191	2.70437	3.31169		3.86598	3.10811	5.30012	3.8699
363	2.13536	4.88962	2.6313	2.26441		5.34258	3.3558	3.51581	3.86143
396	6.17117	2.52767	4.17548	5.89588		7.30444	7.08255	3.39299	3.22206
429	2.59628	5.63613	2.71704	2.9496		3.31314	3.403	3.10052	4.01836
462	5.26634	5.76487	2.99469	5.10142		6.17541	4.40731	3.79082	2.99717
495	2.21165	5.5569	4.06389	2.70199		6.02867	4.5078	5.27888	3.49959

## Sheet: Figure3B
Time (S)	pHLIP						No peptide
0	1.17085	1.79781	1.83419	1.86341			2.01532	1.89514	1.83923	1.8423
33	1.48433	1.52571	1.55219	2.05944			1.87296	1.98495	2.01672	1.67115
66	1.7974	1.67192	1.8562	2.0379			2.01491	1.89185	2.16869	2.01378
99	1.78112	1.67241	2.40615	2.73825			1.77446	1.79781	2.01724	2.22271
132	2.87993	3.18675	4.55677	2.80081			3.47568	3.32156	2.80824	3.10767
165	4.18844	3.65311	3.46787	3.24785			4.34946	3.98996	3.50873	3.4279
198	3.57113	4.03968	3.91313	3.3541			3.39655	3.69665	3.42771	3.20213
231	2.7724	3.8445	3.02174	3.67868			3.9552	4.30822	4.08373	3.79773
264	3.53196	3.44064	3.77074	3.32451			3.99135	3.69665	3.37259	3.37702
297	3.58835	3.89234	3.20251	3.47708			4.25093	3.24721	3.48842	3.60356
330	5.52821	4.87386	3.99403	5.56504			5.05153	4.19932	4.74512	4.75776
363	5.25358	5.37147	4.37589	5.39685			4.89332	5.23156	8.4378	4.86043
396	4.81135	5.02368	4.94173	5.59091			7.48394	5.05301	5.05301	5.3682
429	5.51295	4.90708	5.19627	4.39044			5.27437	4.54749	4.57799	4.26169
462	5.29056	4.82378	6.24048	4.52005			5.3682	4.81135	4.16504	6.28964
495	5.3682	4.36967	5.02368	5.99843			4.79049	4.96884	6.55576	5.15435

## Sheet: Figure3C
Time (S)	PITCRG41P						No peptide
0	1.8102	1.82757	1.48635				1.64023	1.68167	1.53906
33	1.79729	1.4941	1.55004				1.81627	1.5152	1.64137
66	1.53062	1.78438	1.68849				1.79497	1.82393	1.61767
99	1.60867	1.46159	1.81446				1.56108	1.4745	1.56488
132	2.81496	2.79415	3.37643				2.38152	2.5284	2.06672
165	3.98479	3.69025	2.66667				3.16137	3.62991	2.84461
198	3.21672	3.169	2.37979				3.33408	2.63489	2.78742
231	2.64172	3.01912	3.15621				2.58559	2.74928	3.21206
264	2.85541	2.51076	3.09288				3.98479	2.95652	3.55387
297	2.57484	3.16544	2.63079				2.8676	2.65396	2.54644
330	3.77454	3.82609	3.84314				4.6196	3.44021	4.36084
363	4.21031	4.41395	4.26695				5.3368	4.65362	4.1981
396	4.66142	4.31001	4.1981				4.73969	4.08552	5.35528
429	4.31143	4.17338	3.98787				4.40484	4.36084	3.33389
462	3.92864	4.20615	3.56657				4.20237	4.19009	4.25647
495	3.72685	3.50218	3.76427				4.29721	4.33165	3.88675

## Sheet: Figure3D
	No peptide				pHLIP				PITCR				PITCRG41P
	1	1	1		0.826638	0.896411	1.04236		0.586795	0.713546	0.635512		0.893455	0.973951	0.999382
