# Supplementary material for: Allosteric inhibition of the T cell receptor by a designed membrane ligand
Source: eLife journal article supplement (doi:10.7554/elife.82861), 2023-09-21
Supplement: data1 [file Figure3_FigureSuppl_1.xlsx]

## Sheet: Sheet1
A
No peptide				PITCR
1.83224	2.3838	2.91491		1.07515	1.70095	1.85246
B
No peptide				pHLIP
4.50946	1.92298	2.19484		3.72769	1.72378	2.28782
C
No peptide				PITCRG14P
2.14858	2.08362	2.09971		1.91965	2.02935	2.09841
