# Supplementary material for: Allosteric inhibition of the T cell receptor by a designed membrane ligand
Source: eLife journal article supplement (doi:10.7554/elife.82861), 2023-09-21
Supplement: data1 [file Figure4.xlsx]

## Sheet: Figure4C
OVA concentration	No peptide			PITCR			pHLIP
1	46.21	45.01		39.82	38.72		44.24	43.84
0.01	39.55	37.95		35.26	34.26		39.45	39.05
0.001	32.94	32.94		28.59	28.49		31.97	32.77
0.0001	26.89	24.69		24.03	23.33		26.91	25.91
1e-05	18.76	20.26		16.77	17.07		17.8	16.7
1e-06	15.19	14.19		13.24	12.74		13.77	14.27
1e-07	13.67	13.67		12.7	13		13.46	13.26
1e-08	14.16	14.46		12.69	12.69		13.15	13.25

## Sheet: Figure4D
1 microM OVA
	No peptide					PITCR
	40.04	32.22	45.61	36.37		31.74	20.49	39.27	30.88
	No peptide					pHLIP
	40.04	32.22	45.61	36.37		38.83	27.99	44.04	36.02
