# Supplementary material for: Allosteric inhibition of the T cell receptor by a designed membrane ligand
Source: eLife journal article supplement (doi:10.7554/elife.82861), 2023-09-21
Supplement: data1 [file Figure5.xlsx]

## Sheet: Figure5B
Distance	PITCR	CD3ε
0	2	99
1	2	99.986
2	2	99.978
3	2	100.967
4	2	101.944
5	2	102.944
6	2	103.933
7	2	104.922
8	2	106.889
9	2	107.9
10	3	108.889
11	3	110.878
12	3	111.867
13	3	113.856
14	3	115.844
15	3	116.875
16	3	118.822
17	3	120.811
18	3	122.8
19	3.053	123.842
20	4	125.833
21	4	127.825
22	4	128.817
23	4	130.808
24	4	132.8
25	4	133.792
26	4	134.856
27	4	136.775
28	4	137.767
29	4	138.758
30	4	138.833
31	4	139.828
32	4	139.822
33	4	140.817
34	4	140.811
35	4	140.806
36	4	140.8
37	4	139.897
38	4	139.894
39	4	139.783
40	4	138.889
41	4	137.886
42	4	136.883
43	4	135.881
44	4	134.878
45	4	133.875
46	4	132.872
47	4	131.869
48	4	130.867
49	4	129
50	4	127.861
51	4	126.858
52	4	125.856
53	4	124.853
54	4	123.85
55	4	122.847
56	4	121.844
57	4	120.842
58	4	119.839
59	5	119.836
60	5	118.833
61	5	118
62	5	117.828
63	5	117.825
64	6	117.822
65	6	117
66	6	117.817
67	7	117.814
68	7	117.811
69	7	118
70	8	118.806
71	8	119.803
72	9	120
73	9	121
74	10	122
75	10	123
76	11	124.789
77	12	126
78	12.217	127
79	13.219	129
80	14	131
81	15.225	132
82	16.228	134
83	18	136
84	19	138
85	20.236	140
86	22.239	142.239
87	24	145
88	26	147
89	28	149
90	30.25	152
91	33	154
92	35.256	156.256
93	38.258	159
94	41.261	161.261
95	44.264	164
96	48.267	166
97	51.269	168.269
98	55.272	170.272
99	59.275	173
100	63.556	175
101	68.281	177
102	72.567	179
103	77.572	180.286
104	82.578	182
105	87.583	184
106	93.589	185
107	98.594	187
108	104.6	188
109	110.606	189
110	116.611	190
111	122.617	191
112	128.933	192
113	135.628	193
114	141.95	193
115	148.639	194
116	154.967	194
117	161.65	194
118	167.983	194
119	174.661	194
120	181	194
121	187.672	194
122	193.678	194
123	199.683	193
124	205.033	193
125	210.694	192
126	215.7	191
127	220.706	190
128	224.711	189
129	228.717	188
130	232.722	187
131	236.364	185
132	239.367	184
133	241.739	182
134	244.372	181
135	246.375	179
136	248.378	177
137	249.381	175.381
138	250.383	173.383
139	251.386	171.386
140	252.389	169.389
141	253	167
142	253.394	165
143	254	163
144	254	160.4
145	254	158
146	254	156
147	254	153.408
148	253	151
149	253	149
150	252.583	146.417
151	252	144.419
152	251	142.422
153	250	140.425
154	249	138.428
155	248	136.431
156	246.567	134.433
157	245.564	133
158	243.561	131.439
159	242.558	129.442
160	240.556	128.444
161	238.553	126.447
162	236.55	125.45
163	235.094	123.453
164	233.544	122.456
165	231.542	121.458
166	229.539	120.461
167	227.536	118.928
168	226.067	117.933
169	224.061	116.939
170	222.056	115.944
171	220.05	115.475
172	218.522	114.478
173	217.039	113.961
174	215.033	112.967
175	213.028	111.972
176	212.022	110.978
177	210.017	110.492
178	208.506	109.989
179	207.006	108.994
180	206	108
181	203.994	108.006
182	202.989	107.011
183	201.492	106.017
184	199.978	105.022
185	198.972	105.028
186	197.967	104.033
187	196.961	103.558
188	195.956	103.044
189	194.95	102.05
190	194.944	102.056
191	193.939	101.592
192	193.467	101.067
193	192.928	101.072
194	192.922	100.617
195	192.917	100.625
196	192.456	100.633
197	192.906	100.642
198	192.9	100.65
199	192.894	101.106
200	192.889	101.111
201	193.883	102.117
202	193.878	102.122
203	194.872	103.128
204	195.867	104.133
205	196.861	104.708
206	197.856	105.717
207	198.85	107.15
208	199.844	108.733
209	201.419	109.742
210	202.833	111.75
211	204.414	113.172
212	205.822	115.178
213	207.817	117.183
214	209.811	119.783
215	211.403	121.792
216	213.4	123.8
217	215.794	126.808
218	217.789	128.817
219	220.392	131.825
220	222.389	134.444
221	224.772	137.456
222	227.383	139.85
223	229.381	142.858
224	232.378	145.867
225	234.375	148.875
226	237.372	151.511
227	239.369	154.522
228	242	157.533
229	244	160.544
230	246	162.917
231	247.358	165.567
232	249	168.578
233	250.353	170.589
234	251.35	172.95
235	252.347	174.958
236	253	176.967
237	254	178.975
238	254	180.644
239	255	181.992
240	255	183
241	255	184.008
242	255	185.017
243	255	186.025
244	255	186.033
245	255	186.042
246	255	186.05
247	255	186.058
248	255	185.067
249	255	184.075
250	255	182.389
251	255	181.092
252	255	179.1
253	254	176.406
254	254	174.411
255	253	171.417
256	252	168.422
257	250	165.428
258	247.283	161.433
259	244	157.719
260	240	153.722
261	236	149.725
262	231	145.728
263	225	141.731
264	219	137.733
265	212	132.736
266	205	128.739
267	198	124
268	190	119.744
269	182	115.747
270	174.25	111
271	166.247	107
272	158.244	103
273	150.242	99
274	143	95.239
275	135	92
276	127.233	88.233
277	120	85
278	112.228	81.228
279	105.225	78.225
280	99	76.222
281	92	73.219
282	86	71.217
283	80	68.214
284	74	66.211
285	69	64.208
286	63.206	62.411
287	59	61.203
288	54	59.2
289	50	57.394
290	46	56.389
291	42	55.192
292	38.189	54.189
293	35	52.372
294	32	51.367
295	29.181	51.181
296	27	50.178
297	24	49.175
298	22	48.344
299	20	47.339
300	18	47.167
301	16.164	46.328
302	15	46.161
303	13.158	45.317
304	12	45.311
305	11	45.153
306	10	44.3
307	9.147	44.294
308	9	44.144
309	8	44.142
310	7.139	43.278
311	7	43.136
312	6	43.133
313	6	43.131
314	5.128	42.256
315	5	42.25
316	5	42.122
317	4.119	42.119
318	4	42.117
319	4	42.114
320	4	41.222
321	4	41.108
322	3.106	41.106
323	3.103	41.103
324	3	41.1
325	3	41.097
326	3	41.094
327	3	41.092
328	3	41.089
329	3	41.086
330	3	41.083
331	3	41.081
332	3	41.078
333	3	41.075
334	3	41.072
335	3	41.069
336	3	42
337	3	42
338	3	42.061
339	3	42.058
340	3	42.056
341	3	42.053
342	3	42.05
343	3	43
344	3	43.044
345	3	43.042
346	3	43.039
347	3	43.036
348	3	44
349	3	44.031
350	3	44.028
351	3	44.025
352	3	44.022
353	3	44.019
354	3	45.017
355	3	45.014
356	3	45.011
357	3	45.008
358	3	45.011
359	3	46.003
360	3	46

## Sheet: Figure5C
Distance	PITCR	CD3ε
0	0	39
1	0	39.975
2	0.951	40.951
3	1	41.926
4	1	42.901
5	1.877	43.877
6	2	45.704
7	2.433	46.827
8	2.949	48.398
9	3	49.769
10	3.797	51.684
11	4.729	53.564
12	5	55.408
13	5.564	57.358
14	6.031	59.98
15	6.728	62.427
16	7.605	64.694
17	8.581	67.443
18	10.067	70.03
19	11.072	72.658
20	12.367	75.52
21	14.054	78.446
22	15.704	81.275
23	17.872	83.868
24	20.041	86.357
25	21.995	88.936
26	24.159	91.377
27	26.839	93.586
28	30.119	95.714
29	33.48	97.882
30	36.98	100.051
31	41.128	102.043
32	45.708	103.21
33	50.33	104.556
34	55.317	106.563
35	60.865	107.756
36	67.677	108.949
37	74.858	110.142
38	82.284	111.335
39	89.717	112.528
40	98.767	113.718
41	108.242	114.841
42	118.141	115.144
43	128.126	116.3
44	138.635	118.023
45	149.411	118.594
46	160.107	119.894
47	170.742	121.305
48	180.559	122.349
49	189.953	123.196
50	198.314	123.771
51	206.048	124.206
52	213.038	124.642
53	219.396	125.077
54	224.572	124.845
55	228.999	124.305
56	232.151	123.765
57	234.274	122.631
58	236.016	121.328
59	237.673	120.216
60	238.855	119.023
61	238.829	117.29
62	238.778	115.557
63	238.833	113.824
64	238.175	112.484
65	236.928	111.418
66	235.463	110.6
67	233.16	110.239
68	230.626	109.482
69	227.671	109.022
70	224.279	109.239
71	220.168	109.705
72	216.058	110.748
73	211.749	111.199
74	206.553	112.439
75	201.25	114.199
76	195.946	115.727
77	190.643	117.1
78	185.414	118.075
79	180.608	119.102
80	174.722	121.037
81	168.795	122.636
82	163.274	123.829
83	156.731	124.066
84	151.606	125.215
85	145.254	125.952
86	138.833	126.635
87	132.737	126.94
88	126.003	127.158
89	119.875	126.874
90	113.919	126.408
91	107.35	126.48
92	100.977	125.619
93	95.334	124.329
94	89.164	123.348
95	83.428	122.417
96	78.012	121.337
97	72.478	120.186
98	67.425	118.455
99	62.766	116.789
100	58.107	114.714
101	53.448	112.441
102	49.273	110.758
103	45.395	108.896
104	41.543	106.623
105	38.631	104.35
106	35.893	102.077
107	33.026	100.058
108	30.67	98.019
109	28.379	95.612
110	26.428	93.361
111	24.861	91.765
112	23.617	89.764
113	22.389	87.735
114	21.631	85.779
115	20.681	84.711
116	19.116	83.116
117	18.358	82.358
118	17.628	81.601
119	16.994	80.849
120	16.966	80.125
121	16.328	80.338
122	15.57	80.006
123	15.778	80
124	15.059	80
125	15.213	80.018
126	14.54	80
127	14.649	80.562
128	14.866	80.866
129	14.252	81
130	14.302	81
131	14.151	80.232
132	13.927	80
133	13.955	79.282
134	13.479	78.306
135	13.39	77.331
136	13.356	76.356
137	13.14	74.868
138	12.448	73.405
139	12.261	72.43
140	11.933	71.454
141	11.697	70.479
142	11.418	69.504
143	10.66	68.396
144	10.35	67.36
145	10.145	66.338
146	9.388	65.129
147	9.003	64.627
148	8.872	64
149	8.296	64
150	7.897	63.804
151	7.634	63.126
152	7.069	63
153	6.845	63
154	6.421	63
155	6	63
156	5.994	63
157	5.874	62.82
158	5	62.602
159	4.97	62.385
160	4.79	62.158
161	4.049	61.949
162	4	61.731
163	4	61.514
164	4	61.296
165	4	61.078
166	4	61
167	4	61
168	4	61.855
169	4	62
170	4.01	62.816
171	4.831	64.009
172	5	65.958
173	5	67.395
174	5	69.211
175	5.682	71.562
176	6	74.156
177	6.338	77.163
178	6.903	80.177
179	7.583	83.659
180	8	87.343
181	8.534	91.54
182	9.509	96.223
183	10	101.3
184	10.491	106.099
185	11.435	111.436
186	12.411	116.82
187	13.386	122.486
188	14.361	128.451
189	15.337	134.129
190	16.426	139.746
191	17.869	145.762
192	18.852	151.259
193	19.238	157.043
194	20.213	162.264
195	21.189	167.386
196	22	171.845
197	22.139	175.859
198	23.115	179.759
199	24	182.798
200	24	185.802
201	24.041	188.067
202	25	189.884
203	25	190.78
204	25	191.649
205	25	191.578
206	25	190.556
207	25.834	189.476
208	25.963	188.151
209	26	185.972
210	26	183.7
211	26.051	180.633
212	26.769	178.036
213	27	174.488
214	27.72	170.414
215	28.695	166.833
216	29.646	163.351
217	30.56	159.659
218	31.621	156.261
219	32.789	153.162
220	34.76	150.18
221	36.981	147.472
222	38.887	144.763
223	41.493	142.553
224	44.419	140.82
225	47.353	139.536
226	50.695	138.238
227	54.828	137.252
228	59.099	137
229	63.749	137
230	68.577	137.374
231	73.502	138.3
232	78.379	139.416
233	83.507	141.046
234	89.346	142.453
235	95.041	144.403
236	100.441	146.464
237	106.358	148.647
238	111.453	150.383
239	116.547	153.206
240	121.622	155.235
241	126.24	158.107
242	130.772	160.087
243	133.916	163.009
244	137.06	164.959
245	140.203	166.91
246	142.417	168.861
247	144.585	170.811
248	145.88	172.762
249	147.743	173.856
250	148.832	174.832
251	149	176.327
252	149.782	177.644
253	149.981	178.14
254	150.515	179.11
255	150.485	179.88
256	150.768	180.967
257	151.033	181.852
258	150.77	182.337
259	151.224	182.772
260	152.213	183.208
261	152.917	183.543
262	154.011	184.118
263	155.508	184.771
264	157.023	184.938
265	159	184.935
266	161.054	185.243
267	163.109	185.024
268	165.817	184.994
269	168.525	184.89
270	171.16	184.785
271	173.627	184.368
272	175.866	183.514
273	178.528	183.038
274	180.239	182.476
275	181.215	181.179
276	182.19	180.055
277	182.885	179.164
278	182.382	177.286
279	181.422	175.988
280	178.722	174.603
281	175.854	172.382
282	171.56	170.677
283	166.489	168.788
284	159.88	166.678
285	153.27	165.112
286	144.774	162.683
287	135.737	160.684
288	126.459	158.643
289	117.141	156.298
290	106.843	154.581
291	97.152	153.065
292	87.617	151.892
293	78.689	150.854
294	70.292	149.512
295	62.453	148.502
296	55.565	147.745
297	48.955	147.659
298	42.993	147.229
299	37.417	147.094
300	33.046	147.723
301	28.933	148.304
302	25.216	148.886
303	22.393	149.524
304	19.685	150.499
305	17.451	151.475
306	15.718	152.45
307	14.055	153.425
308	12.653	154.401
309	11.896	155.376
310	11.138	156.172
311	10.38	156.707
312	9.645	156.947
313	9.103	157.142
314	8.838	157.36
315	8.578	157.578
316	8.634	157.795
317	8.011	157.824
318	8	157.195
319	8	156.929
320	8	156.562
321	8	155.804
322	8.102	154.945
323	8.319	153.97
324	8.537	152.992
325	8.755	151.778
326	8.999	150.06
327	9	149.068
328	9	147.186
329	9.552	145.787
330	9.978	144.128
331	10.051	142.334
332	10.862	140.383
333	11	138.433
334	11.759	136.482
335	12	134.531
336	12.71	132.581
337	13	130.63
338	13.66	128.679
339	14.636	126.729
340	15	125.389
341	15.586	123.827
342	16.562	122.133
343	17.537	120.599
344	18.512	118.922
345	18.944	117.621
346	19.775	116.864
347	20.894	115.906
348	21.652	114.697
349	22.409	113.57
350	23.167	112.541
351	23.784	111.491
352	24.049	110.951
353	24.589	110.164
354	25.129	109.187
355	25.669	109.331
356	26.1	108.684
357	25.974	107.972
358	26.289	107.493
359	26.687	106.328
360	26.325	105.962
361	26.279	105.091
362	26.393	104.552
363	25.945	104.012
364	25.524	103.472
365	25.608	102.932
366	24.958	102.392
367	25.154	101.852
368	24.759	102.125
369	24.332	101.737
370	23.897	102.103
371	24.308	101.692
372	24.026	101.985
373	23.591	103.248
374	23.927	104.291
375	24.198	105.597
376	24.245	107.296
377	24.57	108.902
378	24.611	111.226
379	24.806	113.83
380	25.622	116.603
381	26.086	119.659
382	26.316	122.736
383	26.787	125.967
384	27.327	129.164
385	27.775	132.771
386	28.441	136.057
387	29.199	139.112
388	29.956	142.264
389	30.714	144.868
390	31.472	147.849
391	32.229	151.032
392	33.099	153.45
393	34.437	156.114
394	35.502	158.11
395	36.514	160.496
396	38.459	162.882
397	40.409	165.181
398	42.36	167.007
399	44.311	169.176
400	46.392	171.547
401	49.318	174.438
402	52.286	176.238
403	55.962	178.849
404	60.081	181.049
405	64.03	184.016
406	68.313	186.347
407	73.396	188.522
408	79.424	190.855
409	85.493	193.73
410	91.563	195.768
411	98.492	197.718
412	105.537	199.415
413	113.321	200.723
414	121.515	201.916
415	129.781	202.844
416	138.019	203
417	146.968	202.846
418	155.495	203
419	163.733	202.483
420	171.971	201.163
421	179.597	199.831
422	186.859	197.981
423	193.559	195.964
424	199.68	193.692
425	204.85	190.74
426	209.568	188.019
427	213.8	185.064
428	217.498	182.038
429	219.976	179.132
430	221.618	176.057
431	222.725	173.566
432	223.049	171.075
433	222.719	168.585
434	221.386	166.245
435	219.604	164.089
436	216.89	162.356
437	213.049	160.84
438	208.39	159.325
439	203.467	157.81
440	197.108	156.438
441	190.921	155.772
442	182.245	154.358
443	174.342	153.788
444	164.918	152.617
445	155.797	151.859
446	145.849	151.005
447	134.995	149.364
448	125.004	148.082
449	115.033	146.157
450	105.062	145.103
451	95.778	143.07
452	86.565	140.901
453	77.862	138.733
454	69.775	136.693
455	62.472	134.34
456	55.209	131.748
457	48.671	128.708
458	42.88	125.685
459	37.698	122.868
460	33.109	120.264
461	28.772	117.887
462	24.784	115.637
463	21.473	113.367
464	18.872	111.417
465	16.075	109.883
466	13.544	107.868
467	11.853	106.184
468	10.66	105.175
469	9.467	104.408
470	8.274	103.678
471	7.081	103.46
472	6.242	103.242
473	5.695	103.025
474	4.941	103.246
475	4.589	103.704
476	4.372	104.255
477	4.154	105.231
478	3.936	106.219
479	3.718	107.463
480	3.501	108.813
481	3.283	110.886
482	3.065	112.215
483	3	114.388
484	3.037	117.138
485	3.432	119.668
486	4	122.026
487	4	124.975
488	4	128.119
489	4.506	131.263
490	5.234	134.406
491	5.897	137.55
492	5.984	140.582
493	6.561	143.508
494	7.264	146.434
495	8.207	149.36
496	9.546	151.524
497	11.274	154.265
498	12.295	156.425
499	13.74	158.125
500	15.57	160.18
501	17.845	161.639
502	20.376	162.177
503	23.053	163.096
504	26.125	163.724
505	29.276	163.942
506	33.175	163.644
507	37.321	163.192
508	41.822	162.811
509	46.746	162.372
510	51.408	161.18
511	56.999	159.856
512	63.198	158.928
513	69.214	157.657
514	75.651	156.682
515	81.834	155.707
516	88.464	155
517	95.179	154.756
518	101.943	154
519	108.617	153.807
520	115.113	153
521	121.464	153.083
522	127.106	153.357
523	133.411	153.139
524	137.956	153.066
525	142.502	153.704
526	147.026	153.497
527	150.597	153.536
528	153.194	154.025
529	155.79	153.833
530	157.817	153.615
531	159.684	153.755
532	160.805	152.643
533	161.472	151.93
534	162.327	151.489
535	162.855	150.675
536	162.39	149.927
537	162.208	148.593
538	162.003	147.621
539	161.177	146.727
540	160.571	145.077
541	160.026	143.882
542	159.015	143.01
543	157.926	141.538
544	156.837	140.27
545	155.749	139.04
546	154.66	137.591
547	153.572	136.743
548	152.15	136.09
549	150.679	135.654
550	149.194	135.045
551	147.382	134.579
552	145.063	134.684
553	143.293	134.788
554	140.882	134.893
555	138.251	134.997
556	135.481	135.415
557	132.91	136.463
558	129.532	137.422
559	126.094	138.321
560	122.888	139.618
561	118.882	140.645
562	115.492	141.3
563	111.26	142.942
564	107.028	144.088
565	102.859	146.102
566	99.563	147.181
567	95.331	148.261
568	91.099	149.341
569	86.866	149.46
570	82.727	150.594
571	78.713	151.608
572	75.585	151.774
573	71.684	151.659
574	67.669	151.139
575	63.836	150.274
576	60.827	149.403
577	57.242	148.533
578	54.184	146.923
579	50.686	145.077
580	47.811	143.417
581	44.867	141.208
582	41.858	138.792
583	39	136.645
584	36.396	133.748
585	33.792	130.792
586	31.501	127.959
587	29.379	124.969
588	26.993	121.501
589	24.607	118.139
590	22.221	114.58
591	20.112	110.612
592	18.724	107.055
593	17.099	103.694
594	15.338	99.988
595	14.145	95.823
596	12.952	92.068
597	11.751	87.957
598	10.566	84.075
599	9.373	80.932
600	8.302	77.91
601	7.856	75.486
602	6.991	72.647
603	6.635	70.479
604	5.952	68.311
605	5.267	66.194
606	5	64.955
607	4.997	63.997
608	4.635	63.635
609	4.011	63.011
610	4	63
611	4	63.925
612	4	64.9
613	3.125	65.875
614	3	67.422
615	3	68.807
616	3	70.602
617	3	72.553
618	3	74.504
619	3	76.454
620	3	79.107
621	3	81.16
622	3	83.163
623	3	85.489
624	3	87.358
625	3	89.091
626	3	90.824
627	3	92.557
628	3	94.29
629	2.97	95.543
630	3	96.3
631	2.73	96.627
632	2.591	96.816
633	2.808	97.192
634	2.652	96.974
635	2.244	96.505
636	2.32	95.858
637	2	95.038
638	2	94.076
639	2	93.652
640	2	92.528
641	2	91.816
642	2	90.877
643	2	90.013
644	2	89.89
645	2	88.914
646	2	88
647	2	88
648	2	88
649	2	88
650	2	88
651	2	88
652	2	88
653	2	88.163
654	2	88.38
655	2	88.598
656	2	88.816
657	2	89.033
658	2	89.251
659	2	89.469
660	2	89.687
661	2	89.838
662	2	89.578
663	2	89.461
664	2	89.284
665	2	88.499
666	2	87.421
667	1.886	86.764
668	1.276	85.614
669	1	84.305
670	1	82.79
671	1	81.274
672	1	80.053
673	1	78.727
674	1	76.994
675	1	75.261
676	1	73.528
677	1	71.795
678	1	70.062
679	1	68.576
680	1	67.556
681	1	65.656
682	1	64.131
683	1	62.443
684	1	60.877
685	1	59.901
686	1	58.9
687	1	57.386
688	0.981	56.212
689	0	56

## Sheet: Figure5D
	PITCR				PITCR + anti-CD3
	0.907333	0.974	0.922571		0.860286	0.90225	0.857636
