# Supplementary material for: Allosteric inhibition of the T cell receptor by a designed membrane ligand
Source: eLife journal article supplement (doi:10.7554/elife.82861), 2023-09-21
Supplement: data1 [file Figure5_suppl1.xlsx]

## Sheet: Sheet1
PITCR				PITCR + anti-CD3
0.444667	0.326667	0.475333		0.416636	0.388429	0.32575
