# Supplementary material for: Allosteric inhibition of the T cell receptor by a designed membrane ligand
Source: eLife journal article supplement (doi:10.7554/elife.82861), 2023-09-21
Supplement: data1 [file Figure6_FigureSuppl_1.xlsx]

## Sheet: Sheet1
A
No peptide						PITCR
1.83224	2.3838	2.91491				1.07515	1.70095	1.85246
			MCC-MHC density	no PITCR
			0.005	0.02
			0.09	0.24
			0.2	0.5
			0.7	0.8
			4	0.9
			MCC-MHC density	without PITCR
			0.005	0.006
			0.08	0.218
			0.15	0.45
			0.2	0.6
			0.8	0.8
			7	0.88
