# Supplementary material for: Allosteric inhibition of the T cell receptor by a designed membrane ligand
Source: eLife journal article supplement (doi:10.7554/elife.82861), 2023-09-21
Supplement: data1 [file Figure8.xlsx]

## Sheet: Figure8B
Norm z/b2
-								+
1	1	1	1	1	1	1		1.28814	1.66069	0.65278	1.97066	6.04248	12.1844	3.00221
Norm z/epsilon
1	1	1	1	1	1	1		2.30461	1.35064	0.737665	1.47425	6.97959	10.5105	3.96741

## Sheet: Figure8C
Norm z/b2
CT								PITCR
1	1	1	1	1	1	1		0.566437	0.536232	0.492354	0.470781	0.927129	0.796339	0.552401
Norm z/epsilon
CT								PITCR
1	1	1	1	1	1	1		0.948842	1.72095	0.406294	0.46884	1.70612	2.17699	2.5015
