# Supplementary material for: Allosteric inhibition of the T cell receptor by a designed membrane ligand
Source: eLife journal article supplement (doi:10.7554/elife.82861), 2023-09-21
Supplement: data1 [file Figure8_Supp1.xlsx]

## Sheet: Sheet1
Figure A. Norm beta/epsilon
1	1	1	1	1	1	1		1.39171	1.18341	1.09675	0.87286	1.2078	0.86262	1.25389
Figure A. Norm beta2/epsilon
1	1	1	1	1	1	1		1.38774	1.04852	1.08526	0.748102	1.15509	0.86262	1.3215
Figure B. Norm beta/epsilon
1	1	1	1	1	1	1		1.50221	1.02918	0.995589	0.860217	1.18888	0.976503	1.79259
Figure B. Norm beta2/epsilon
1	1	1	1	1	1	1		1.61468	1.21546	1.30488	0.855408	1.22419	1.02919	1.79932
Figure C. Norm zeta/beta2
1	1	1	1	1	1	1		0.805464	1.06015	0.508416	0.875781	2.23252	4.1868	1.53309
Figure C. Norm zeta/epsilon
1	1	1	1	1	1	1		0.948842	1.72095	0.406294	0.46884	1.70612	2.17699	2.5015
Figure C. Norm beta/epsilon
1	1	1	1	1	1	1		1.40918	1.50281	0.750317	0.585774	0.794306	0.523026	1.59921
Figure C. Norm beta2/epsilon
1	1	1	1	1	1	1		1.17801	1.62332	0.748453	0.535339	0.764214	0.519964	1.63168
