# Supplementary material for: Allosteric inhibition of the T cell receptor by a designed membrane ligand
Source: eLife journal article supplement (doi:10.7554/elife.82861), 2023-09-21

Lck (pY394)

Marker

- - + +

- + - +

OKT3

PITCR

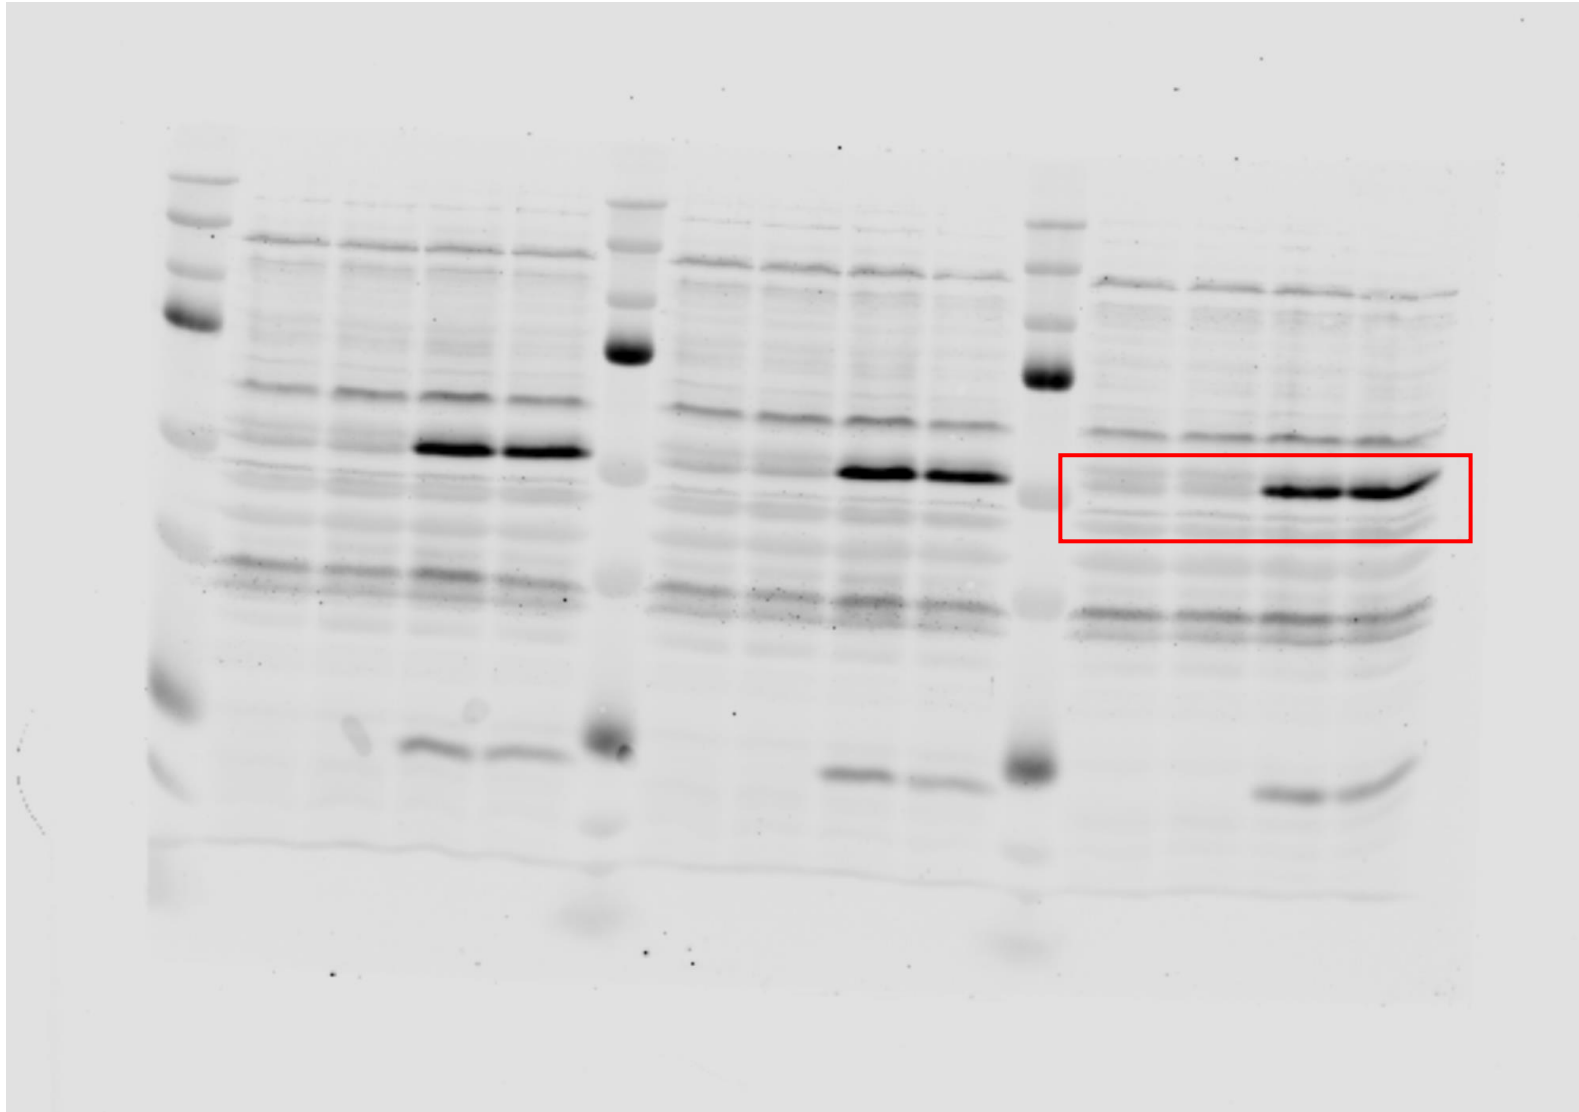

Lck (pY505)

Marker

|   |   |   |   |
|---|---|---|---|
| - | - | + | + |
| - | + | - | + |

OKT3

PITCR

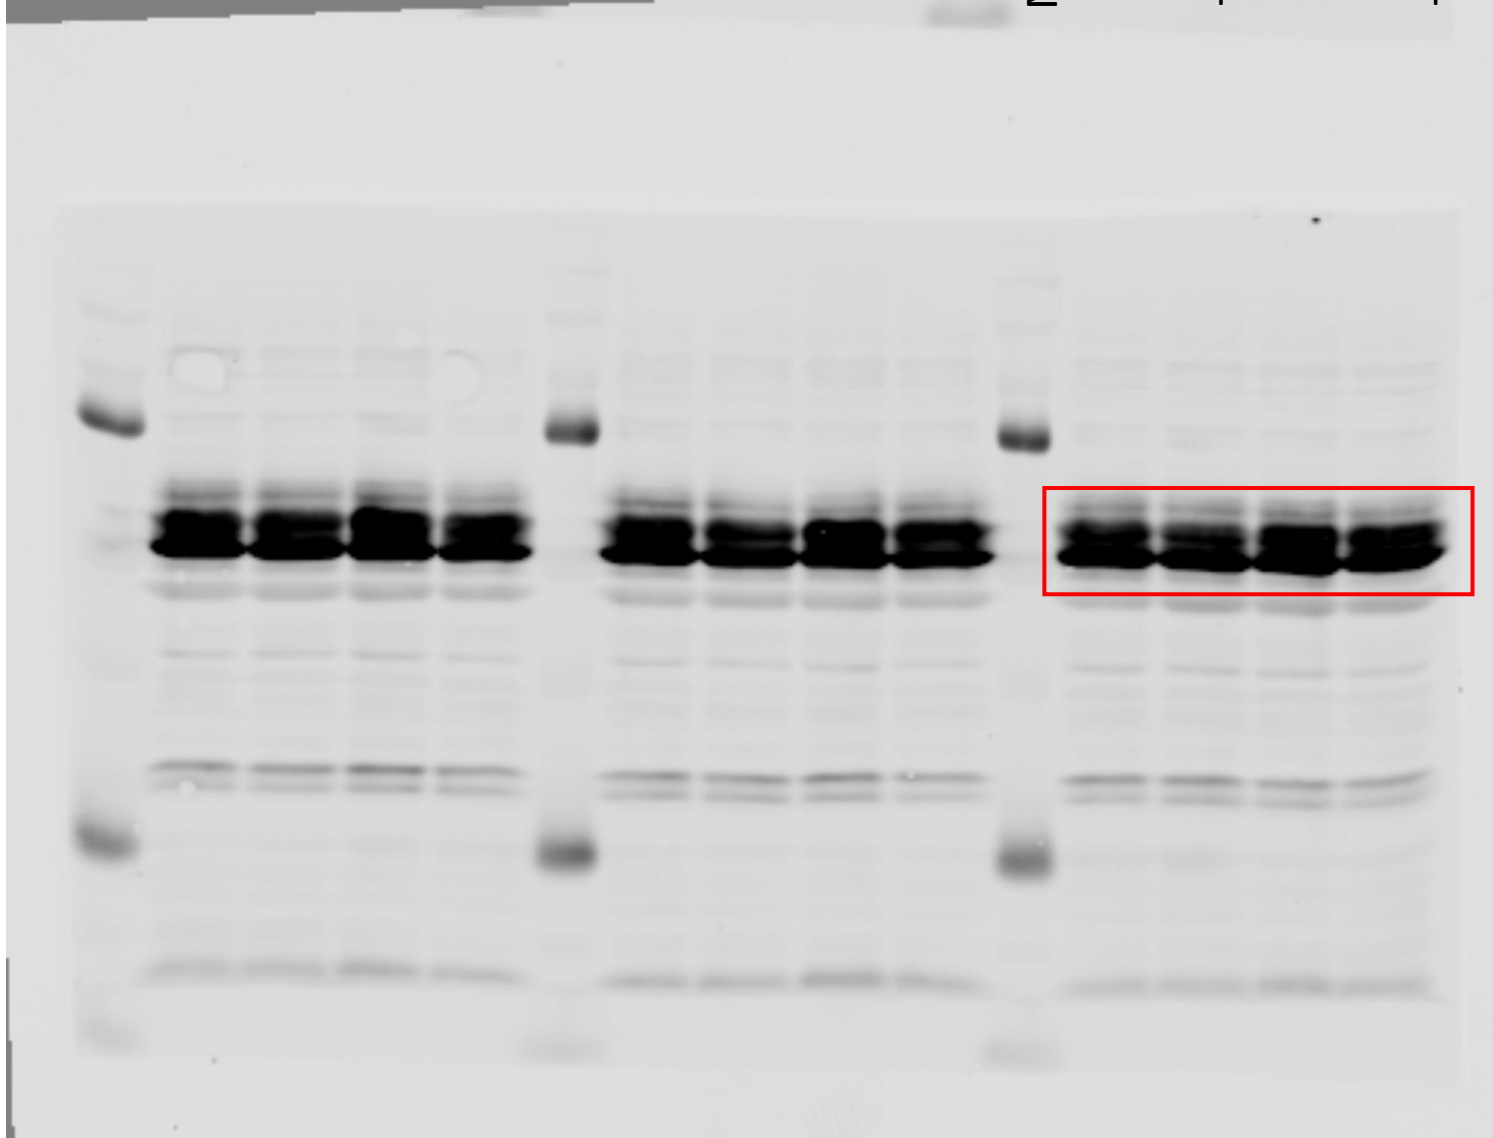

Lck (total)

Marker

- - + +

- + - +

OKT3

PITCR

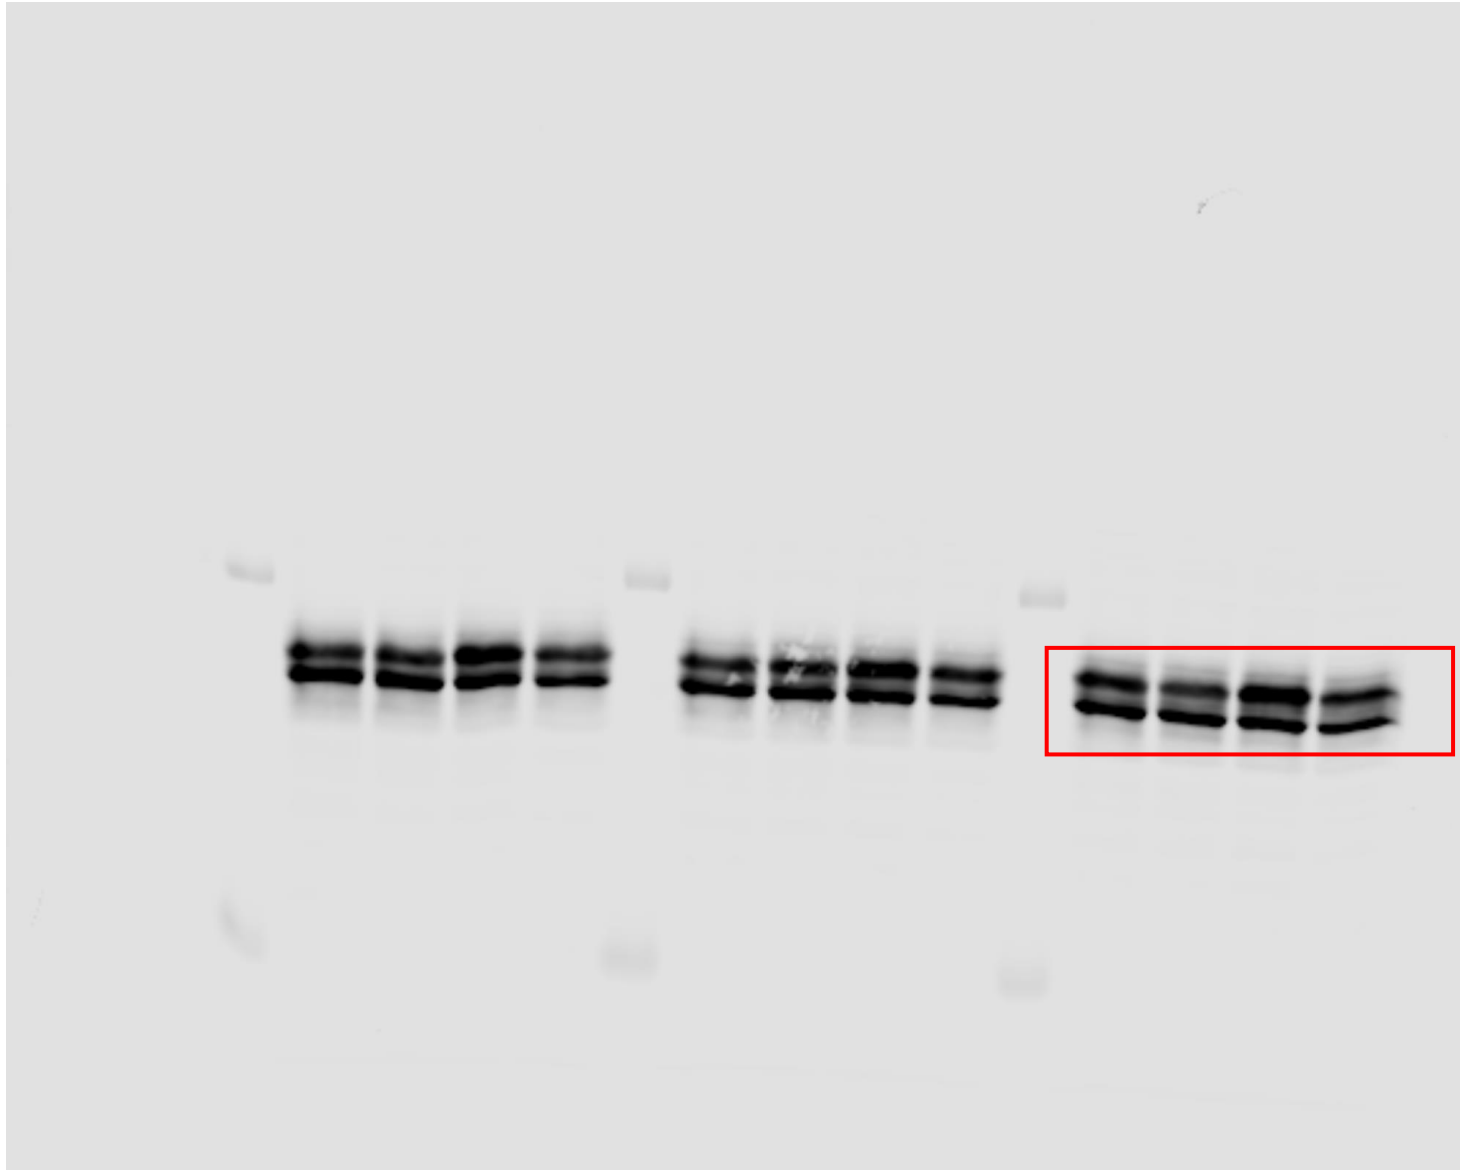

$\beta$ -actin

|        |   |   |   |   |       |
|--------|---|---|---|---|-------|
| Marker | - | - | + | + | OKT3  |
|        | - | + | - | + | PITCR |

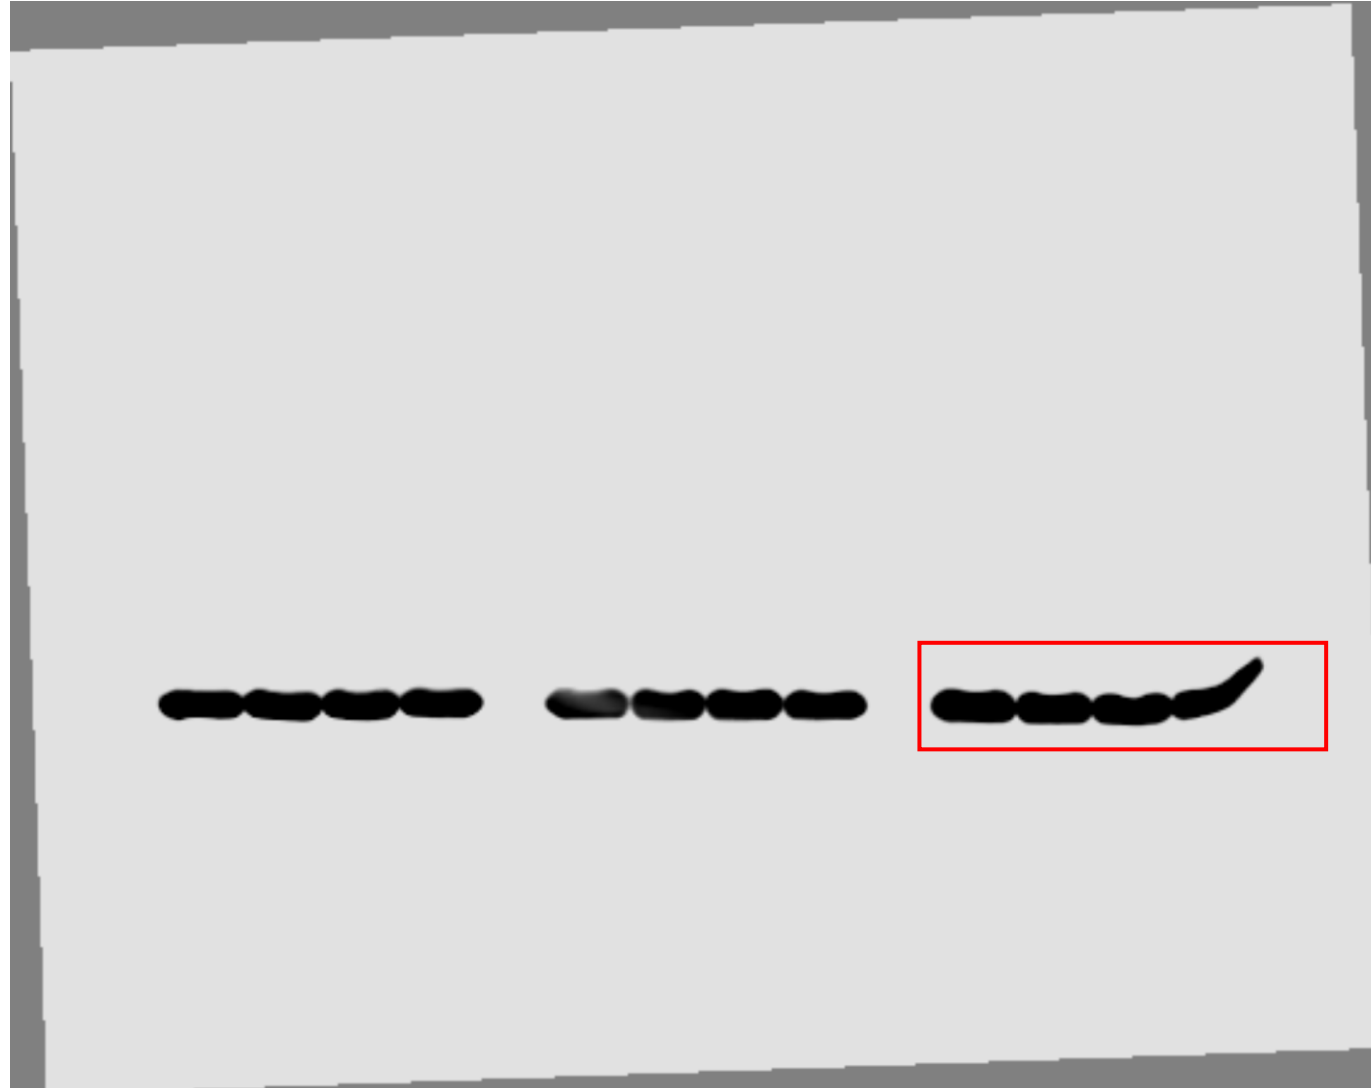

Supplement: fig2-figsupp2-data1 [file Figure2_Figure_supplementary_2_labeled.pdf › Figure2_Figure_supplementary_2_labeled.pdf]
