# Supplementary material for: Allosteric inhibition of the T cell receptor by a designed membrane ligand
Source: eLife journal article supplement (doi:10.7554/elife.82861), 2023-09-21

Figure 8

IP-(DDM)-CD3ζ

|       | Anti-CD3ε - IP |   |   |   | IgG - IP |   |   |   |
|-------|----------------|---|---|---|----------|---|---|---|
| OKT3  | -              | - | + | + | -        | - | + | + |
| PITCR | -              | + | - | + | -        | + | - | + |

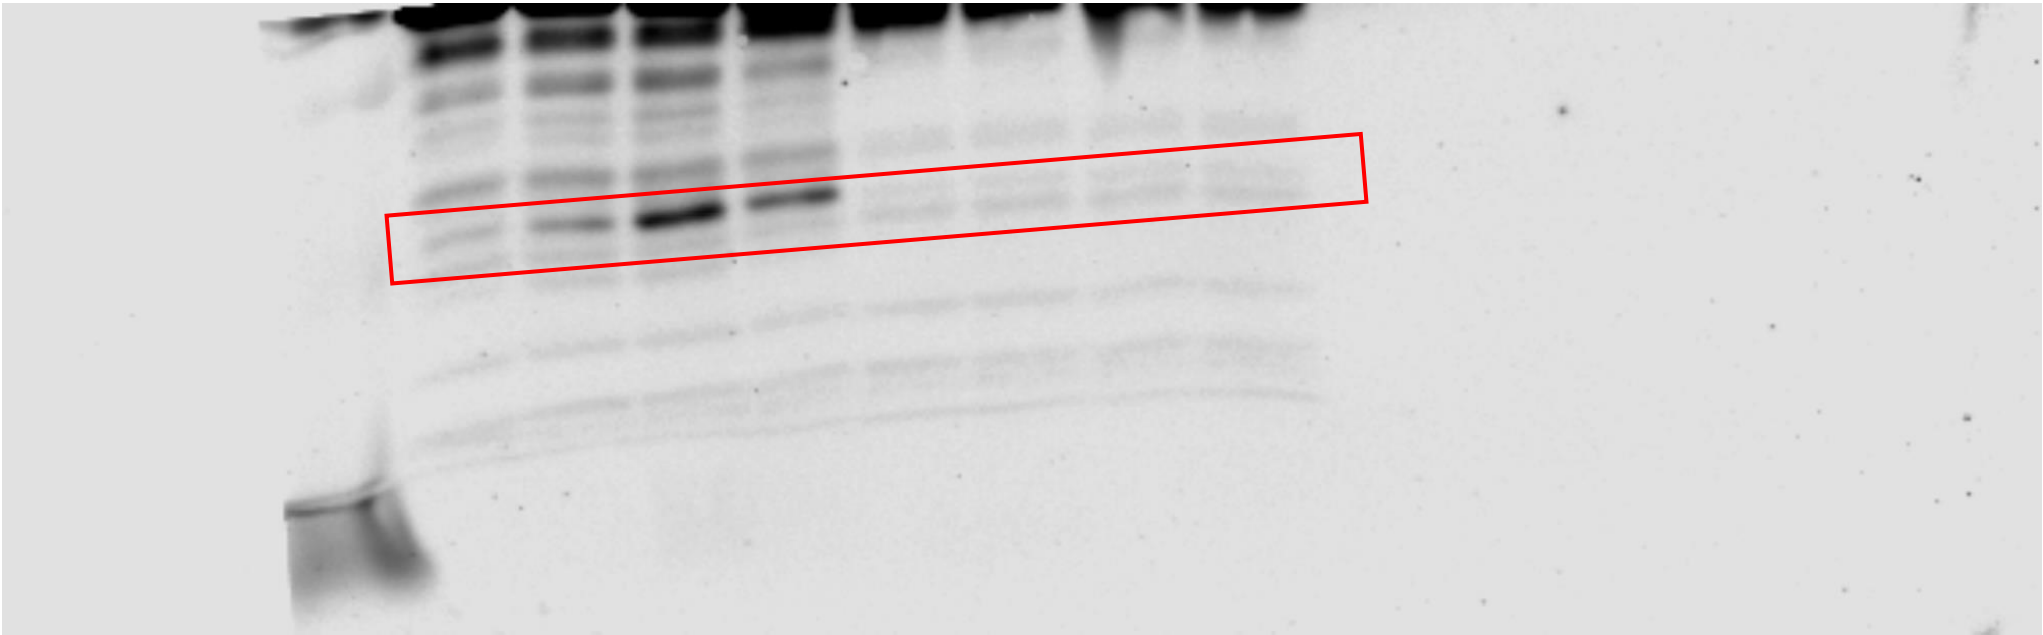

IP-(DDM)-TCR $\beta$

|       | Anti-CD3 $\epsilon$ - IP |   |   |   | IgG - IP |   |   |   |
|-------|--------------------------|---|---|---|----------|---|---|---|
| OKT3  | -                        | - | + | + | -        | - | + | + |
| PITCR | -                        | + | - | + | -        | + | - | + |

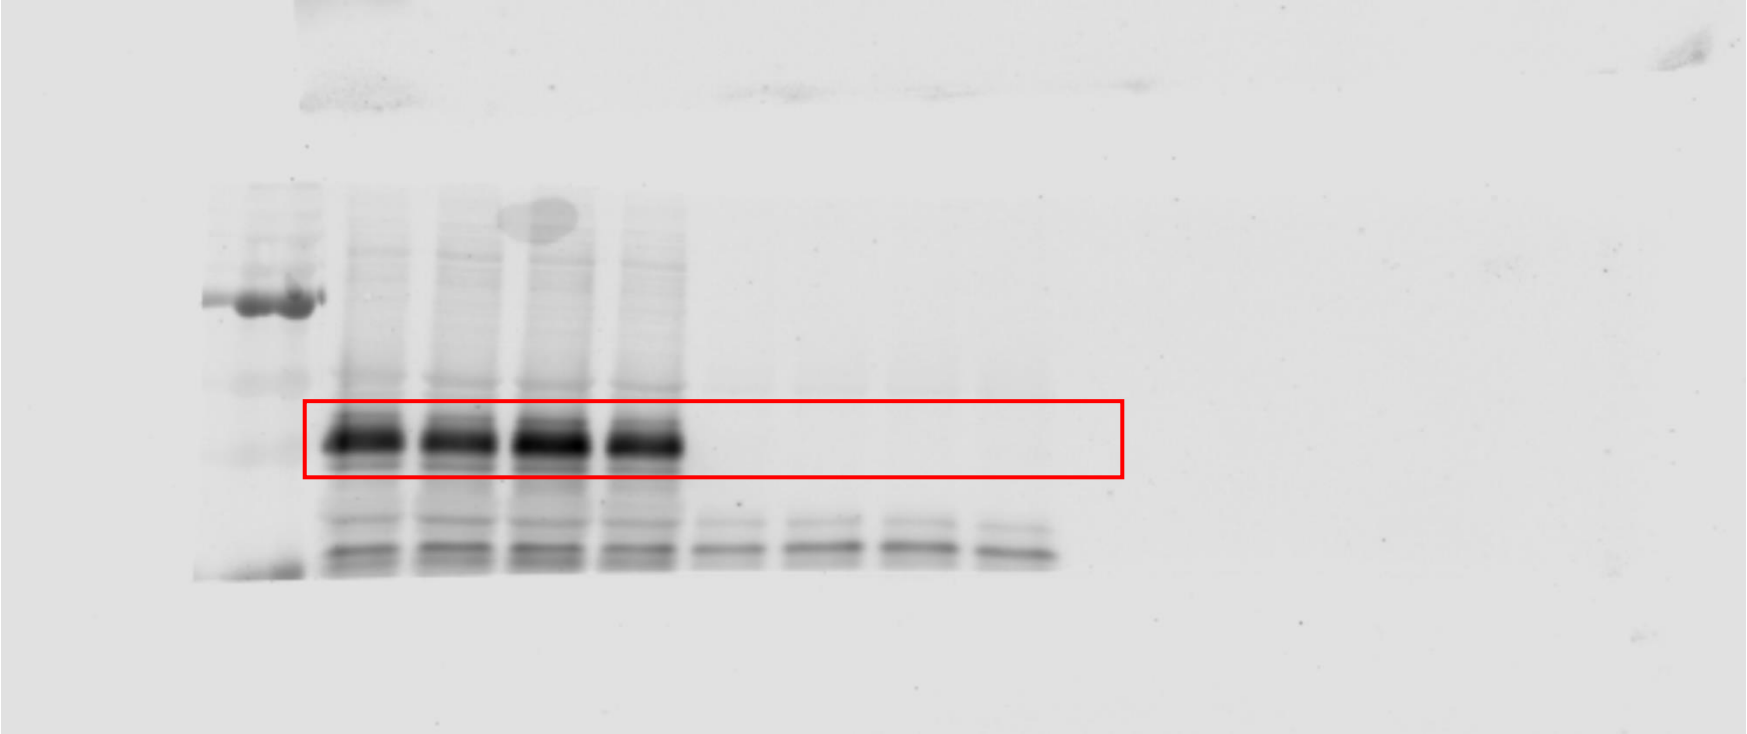

# IP-(DDM)-CD3 $\epsilon$

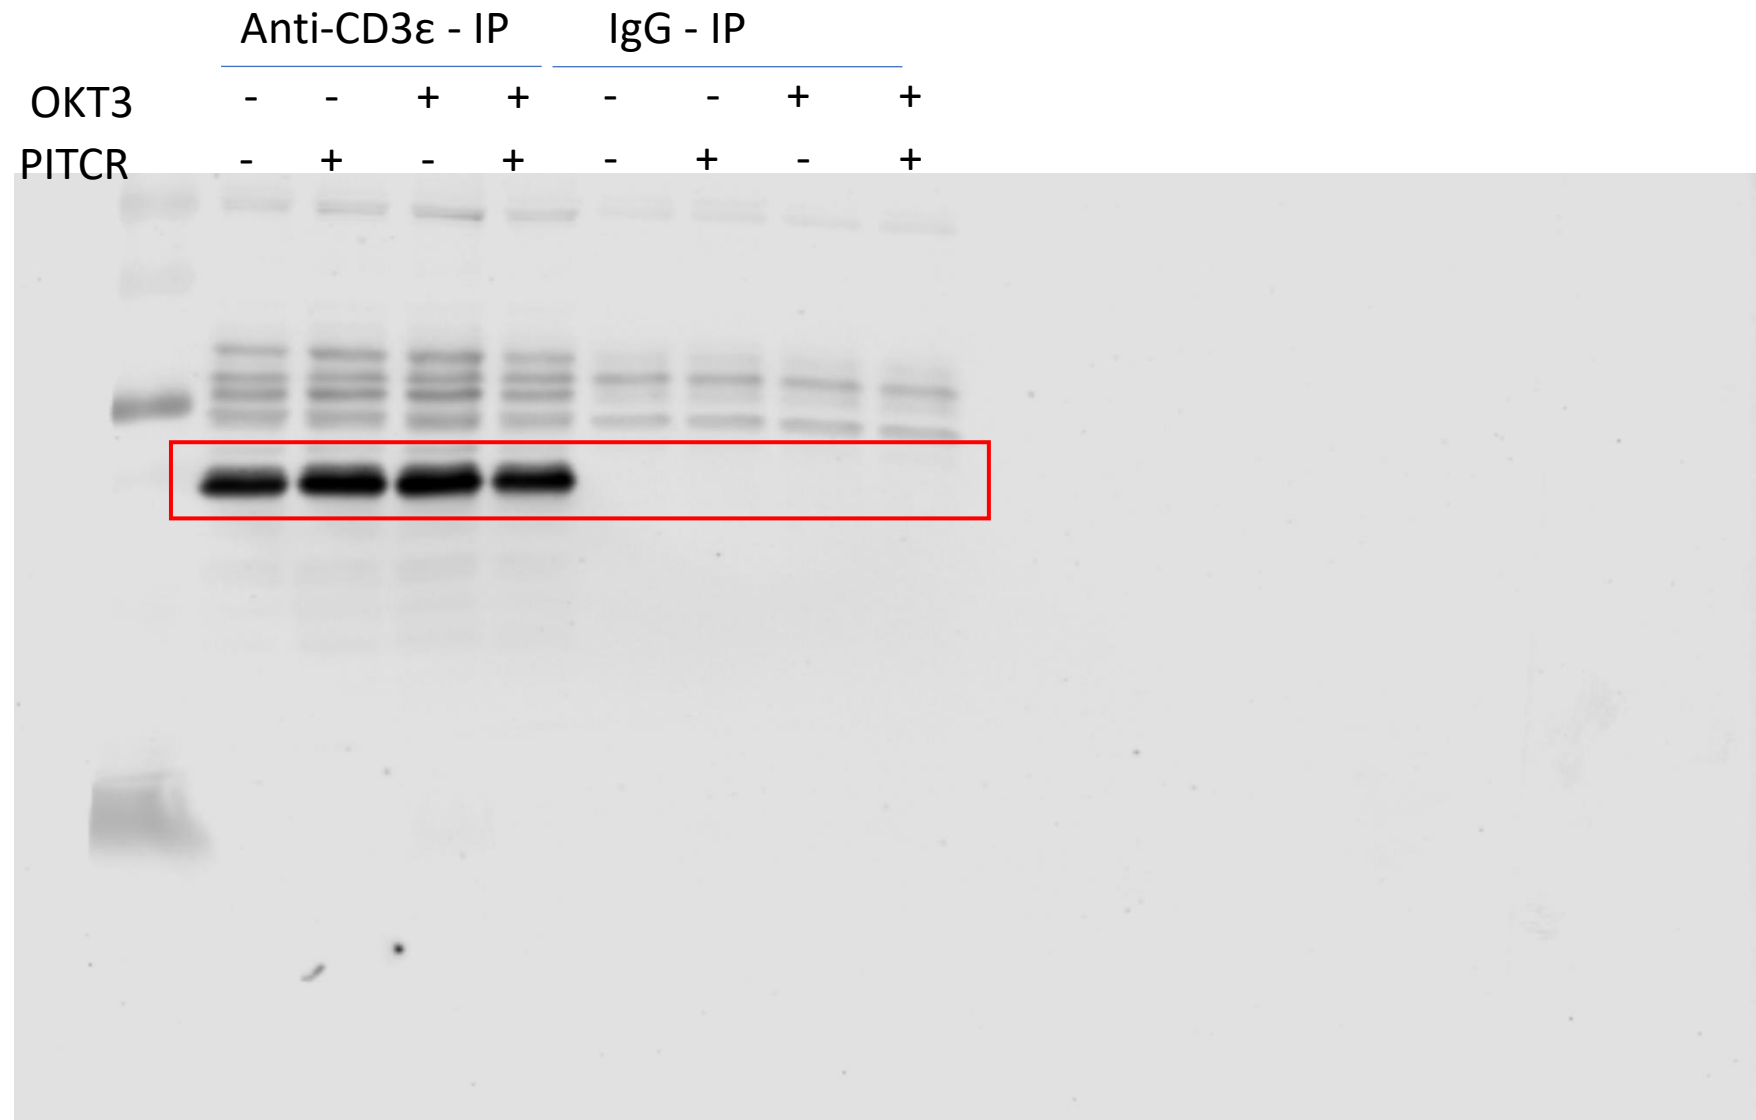

# Whole lysate-CD3 $\zeta$

|       | Anti-CD3 $\epsilon$ - IP |   |   |   | IgG - IP |   |   |   |
|-------|--------------------------|---|---|---|----------|---|---|---|
| OKT3  | -                        | - | + | + | -        | - | + | + |
| PITCR | -                        | + | - | + | -        | + | - | + |

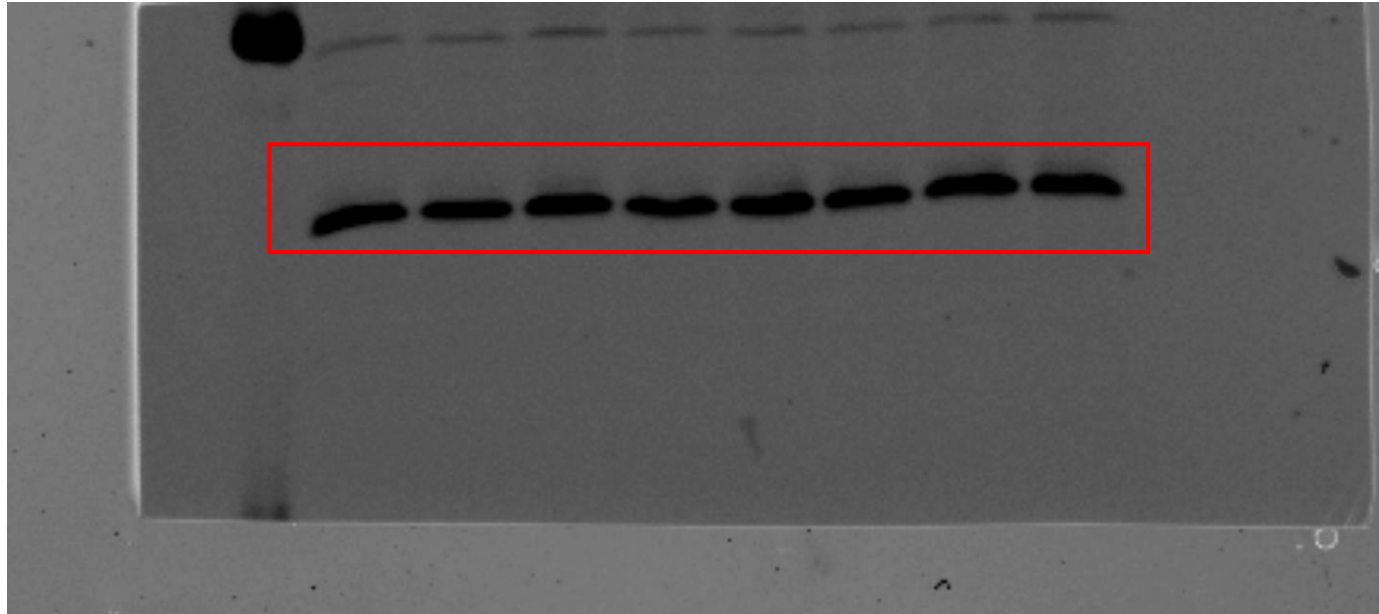

Whole lysate-CD3ε

|       | Anti-CD3ε - IP |   |   |   | IgG - IP |   |   |   |
|-------|----------------|---|---|---|----------|---|---|---|
| OKT3  | -              | - | + | + | -        | - | + | + |
| PITCR | -              | + | - | + | -        | + | - | + |

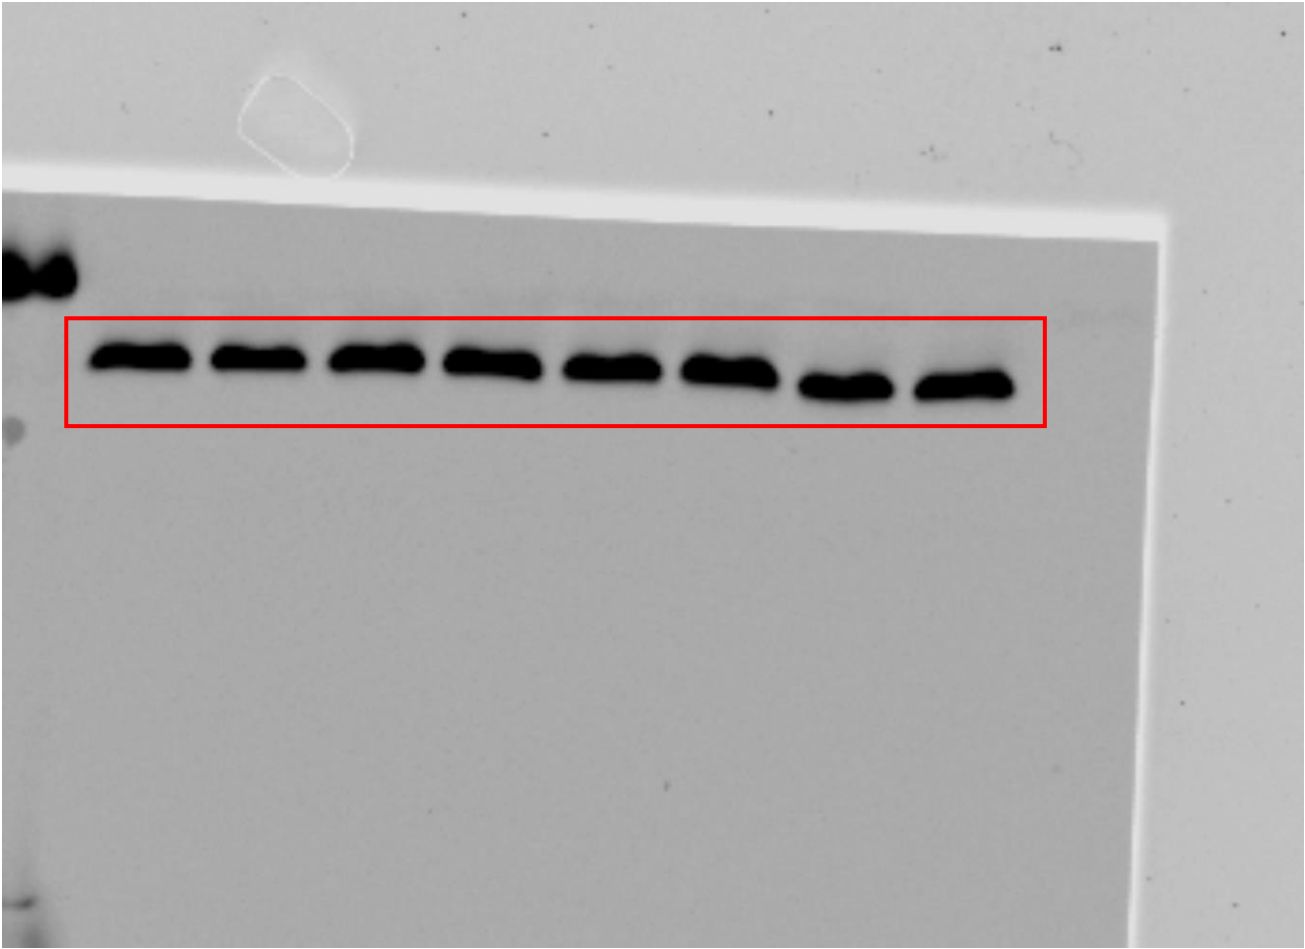

|       | Anti-CD3 $\epsilon$ - IP |   |   |   | IgG - IP |   |   |   |
|-------|--------------------------|---|---|---|----------|---|---|---|
| OKT3  | -                        | - | + | + | -        | - | + | + |
| PITCR | -                        | + | - | + | -        | + | - | + |

Whole lysate-TCR $\beta$

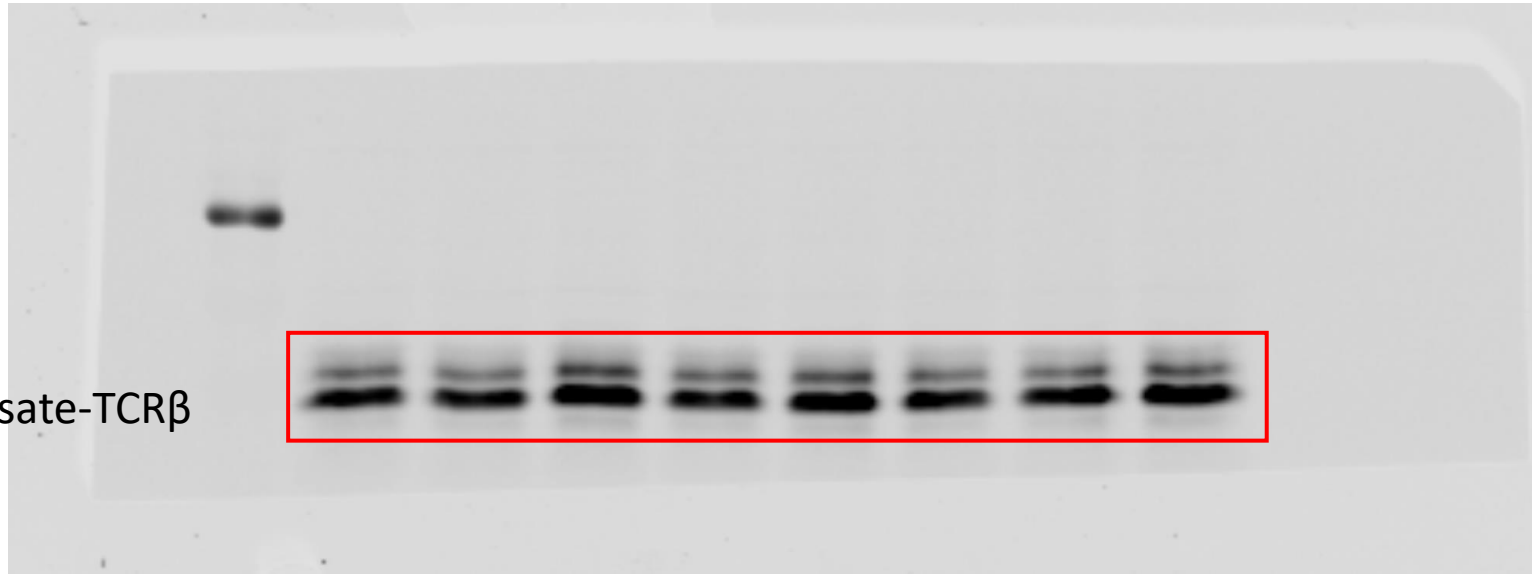

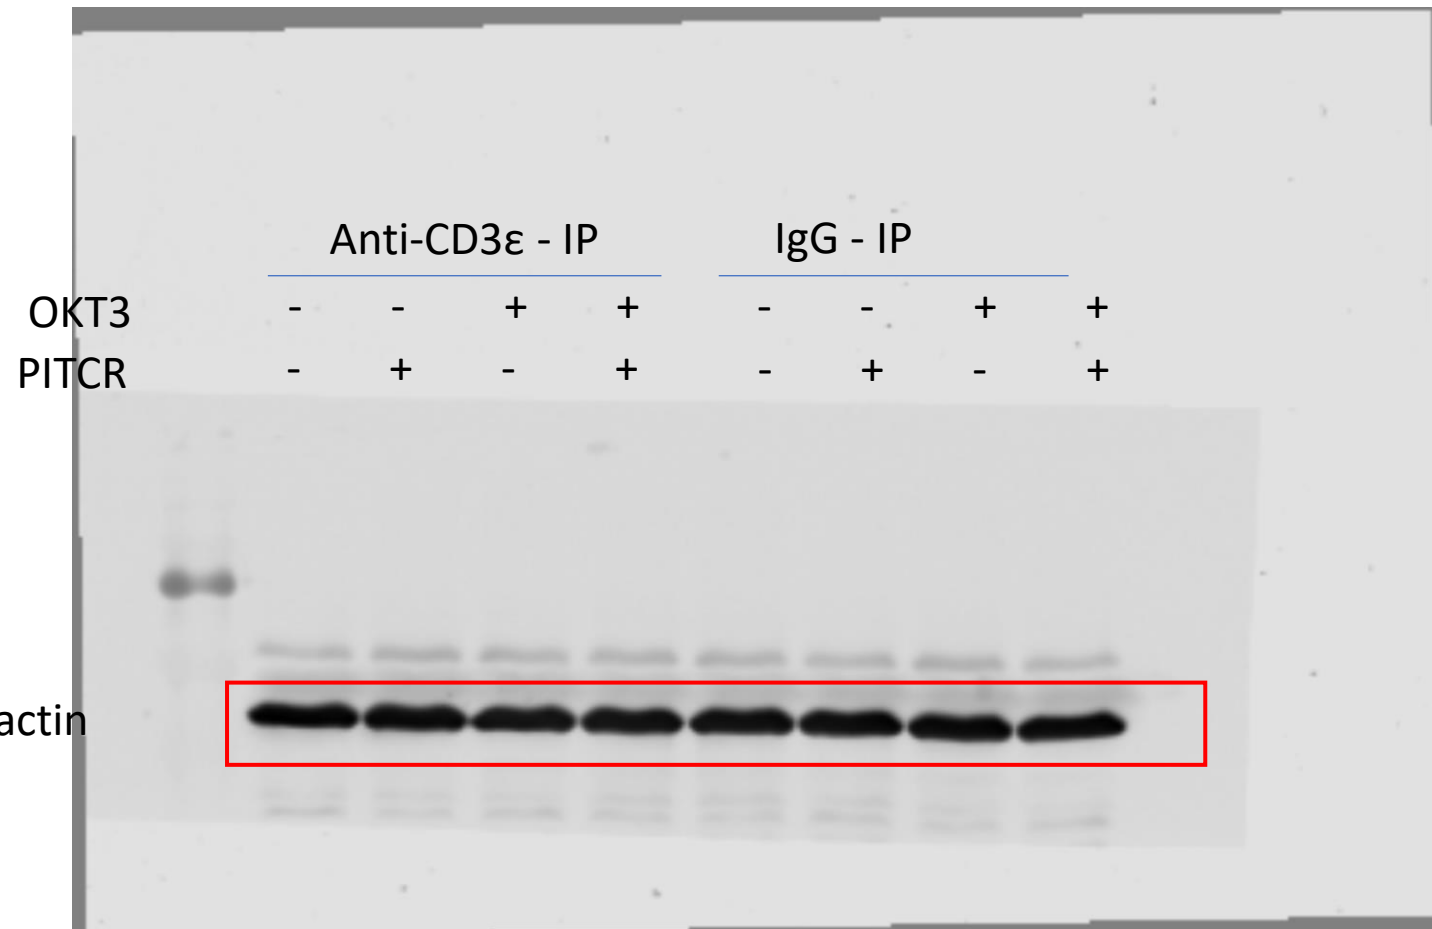

Supplement: fig8-data1 [file elife-82861-fig8-data1-v1.zip]
