# Supplementary material for: Allosteric inhibition of the T cell receptor by a designed membrane ligand
Source: eLife journal article supplement (doi:10.7554/elife.82861), 2023-09-21
Supplement: fig9-data1 [file elife-82861-fig9-data1-v1.pdf]

**A**

| Amino acid in peptide | PITCR contacts with CD3 $\zeta$ | PITCR interaction distance | PITCRG41P contacts with CD3 $\zeta$ | PITCRG41P interaction distance |
|-----------------------|---------------------------------|----------------------------|-------------------------------------|--------------------------------|
| Asp1                  | ZA Tyr33*                       | 3.37Å                      | none                                | -                              |
| Ser5                  | ZB Cys32*                       | 3.60Å                      | none                                | -                              |
| Tyr6                  | ZB Asp28**<br>ZB Leu26**        | 3.37Å<br>2.67Å             | none                                | -                              |
| Tyr15                 | ZA Thr47*                       | 2.76Å                      | ZA Thr47*<br>ZB Tyr42*              | 2.61Å<br>2.79Å                 |
| Thr20                 | ZB Tyr42*                       | 2.89Å                      | none                                | -                              |
| Glu30                 | ZB Arg57*                       | 2.67Å                      | ZB Ser56*                           | 2.72Å                          |

\*Interaction with sidechain atoms in TCR

\*\*Interaction with backbone atoms in TCR

**B**

| Model 1 |    | Model 2         | Maximum displacement of Zeta A $\alpha$ -carbon | Maximum displacement of Zeta B $\alpha$ -carbon | RMSD for Zeta A + Zeta B + TCR $\alpha$ |
|---------|----|-----------------|-------------------------------------------------|-------------------------------------------------|-----------------------------------------|
| TCR     | vs | TCR + PITCR     | 6.01Å                                           | 8.20Å                                           | 1.876Å                                  |
| TCR     | vs | TCR + PITCRG41P | 3.72Å                                           | 3.62Å                                           | 1.179Å                                  |
| TCR     | vs | TCR + TYPE7     | 4.25Å                                           | 3.97Å                                           | 1.044Å                                  |
| TCR     | vs | TCR + pHLIP     | 2.49Å                                           | 1.86Å                                           | 0.438Å                                  |
